# Supplementary material for: Fungal Transformation of Tree Stumps into a Suitable Resource for Xylophagous Beetles via Changes in Elemental Ratios
Source: MDPI journal article supplement (doi:10.3390/insects7020013), 2016-04-09
Supplement: s1 [file s1]

# Supplementary Material

**A**

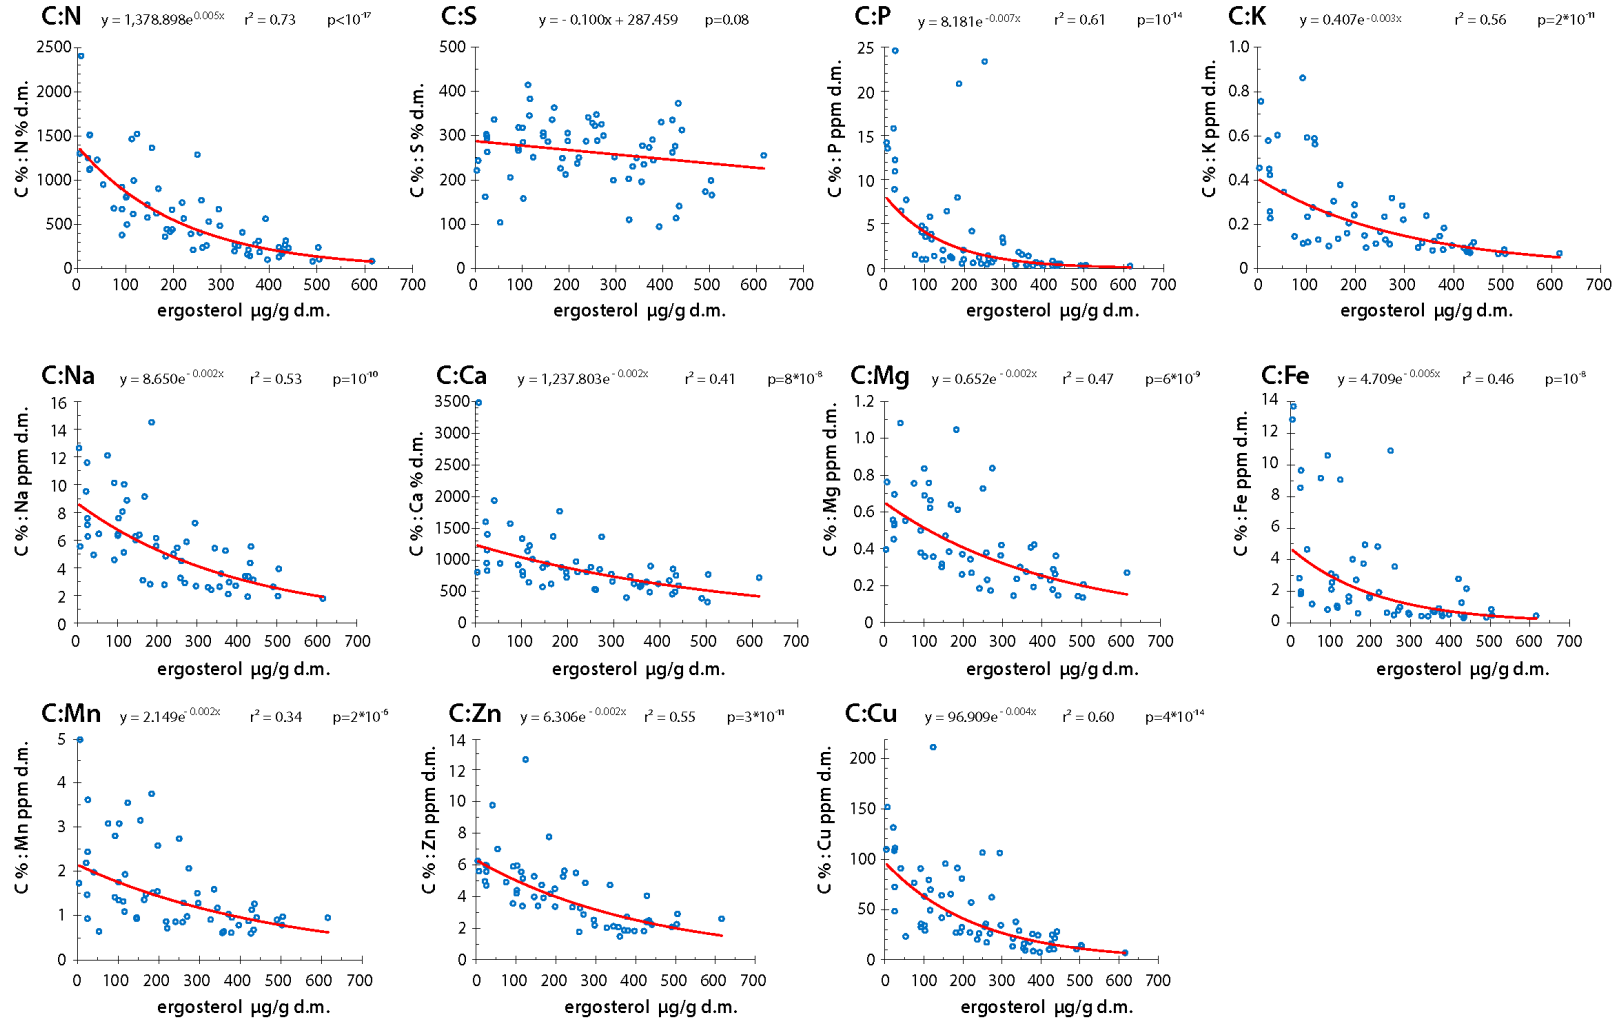

Figure S1. Cont.

**B**

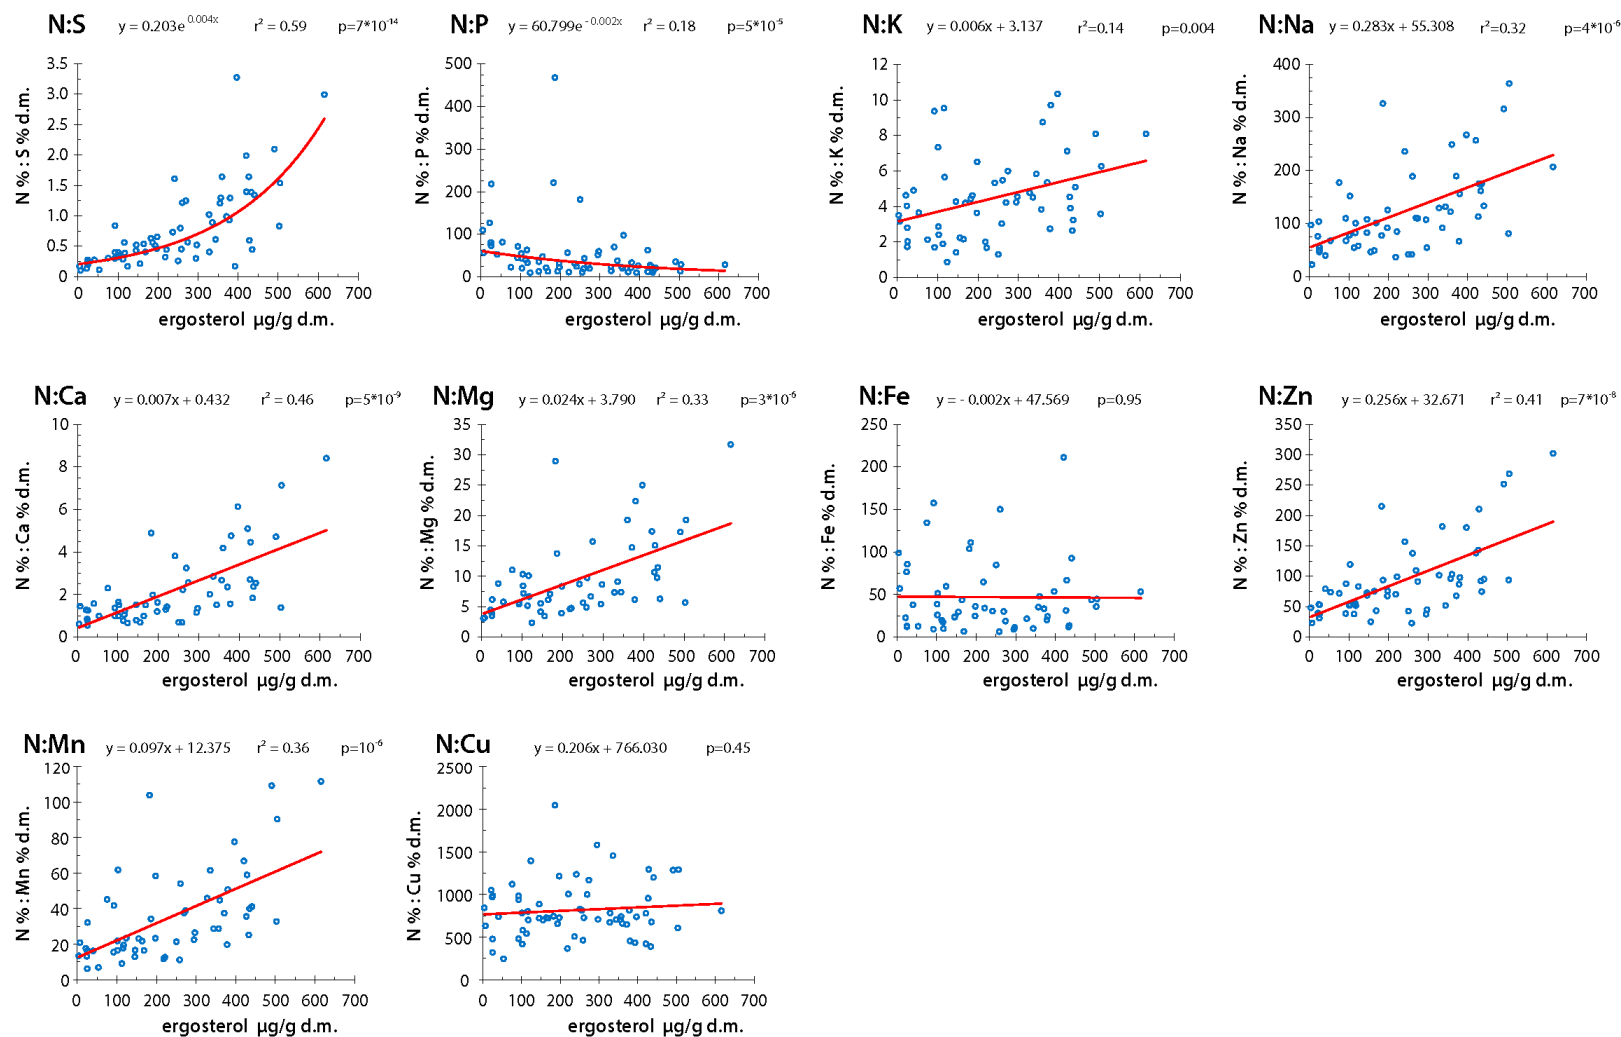

**Figure S1.** Relations between ergosterol contents and: (A) ratios C: other elements; (B) ratios N: other elements, excluding N: C. Measured concentrations and calculated ratios concern wood samples from pine stumps at various stages of decomposition (approx. five months to five years after tree cutting).
