# Supplementary material for: Fungal Transformation of Tree Stumps into a Suitable Resource for Xylophagous Beetles via Changes in Elemental Ratios
Source: Insects. 2016 Apr 9;7(2):13. doi: 10.3390/insects7020013 (PMC4931425; doi:10.3390/insects7020013)
Supplement: Supplementary file 1 [file insects-07-00013-s001.zip › insects-120306-Table S1.xlsx]

## Sheet: dataset
Table S1. All raw data collected. For RDA anlysis only samples containing the whole dataset (12 elements + ergosterol contents) were used.
sample codename	ergosterol µg/g d.m.	N	C	S	P	K	Na	Ca	Mg	Fe	Zn	Mn	Cu
			% d. m.		mg/kg d.m.
1		0.500818	53.0875	0.178614	527.311	1031.59	10.9326	1614.38	555.249	33.2078	38.2348	81.076	4.22373
2	615.848	0.589665	50.2978	0.197049	208.557	729.584	28.5352	701.186	186.201	110.685	19.5083	52.9031	7.3026
3	421.044	0.206329	49.6809	0.148293	176.207								4.91098
4	328.834	0.18618	50.5417	0.461439	135.744								2.38333
5	397.047	0.494261	49.8395	0.150915	190.268	477.763	18.5206	805.694	197.794	92.2924	27.4214	63.8141	6.71499
6	503.381	0.202698	48.598	0.244858	156.655	567.344	24.9377	1462.22	357.116	56.6153	21.609	62.1063	3.35206
7	327.966	0.250102	49.6756	0.246161	108.904	524.885	19.2996	1241.05	340.367	115.047	24.5598	54.6606	3.7182
8	435.399	0.162124	51.2526	0.364527	111.679	503.294	9.27847	681.909	141.517	120.223	21.7148	40.6467	2.39578
9	297.482	0.100755	48.9018	0.194468	16.9245	221.838	18.3683	744.676	116.364	88.8584	22.3922	38.2215	1.4245
10	427.183	0.297652	50.0439	0.181545	111.475	655.969	26.3065	1096.37	279.048	95.8815	20.8325	83.9675	3.11847
11	378.584	0.165532	51.7949	0.178129	80.105	605.775	24.8217	1062.4	268.327	82.7777	19.0642	84.3859	2.03011
12	295.146	0.0797452	53.5141	0.26896	15.558	188.202	7.42082	690.151	147.008	86.4592	21.3278	35.5646	0.505106
13	256.086	0.127196	51.5424	0.160001	122.741								1.56453
14	197.964	0.112234	49.7122	0.172919	50.1884	172.256	8.93137	688.287	134.439	31.2495	14.8001	19.2802	1.54602
15	145.899	0.0949565	54.8194	0.183537	26.9548	222.709	8.77096	623.89	172.144	40.2835	13.8248	57.4734	1.3173
16	241.58	0.240302	50.9329	0.149487	99.4342	451.358	10.193	629.057	275.167	78.6678	15.3245	59.2584	1.9464
17	4.20117	0.0433346	56.3166	0.25449	3.97186	124.003	4.45475	701.465	142.037	4.37745	9.00362	32.5124	0.514382
18	75.6831	0.0735904	50.1945	0.244345	33.3233	346.493	4.14905	319.167	66.5529	5.47868	10.2415	16.3313	0.657681
19	113.712				23.5187	198.516	6.48914	552.72	100.784	7.74627	11.6493	20.4431	0.956276
20	336.126	0.191438	49.6839	0.21591	27.5076	424.094	20.7985	671.388	210.128		10.5226	31.1858	1.31688
21	7.20804	0.0276168	66.3319	0.272463	4.89883	87.8144	12.0103	190.368	87.0876	4.8434	11.8705	13.2994	0.437718
22	124.216	0.0330211	50.2744	0.20036	36.8908	383.995	5.67615	497.45	140.561	5.54694	3.97455	14.1901	0.237075
23	24.4442	0.0494118	55.1893	0.182077	6.20933	122.764	4.76443	583.578	122.119	6.45671	9.23088	37.6449	0.509622
24	392.838	0.0892711	50.4488	0.536156	95.5624								2.06556
25	344.439	0.118404	48.5031	0.194638	31.5413	203.056	8.96913	783.152	160.851	116.355	22.8954	41.4009	1.68077
26	428.7	0.267684	51.3395	0.451157	107.871	687.592	15.3007	600.863	177.329	40.0938	12.715	45.4547	2.07108
27	420.943	0.393139	51.7744	0.197852	63.1165	552.393	15.3227	771.529	226.298	18.6227	28.4943	58.9628	5.04637
28	491.244	0.64068	52.9917	0.306192	182.047	792.373	20.3037	1356.67	370.673	147.01	25.4756	58.746	4.99193
29	250.577	0.0458237	58.9964	0.179693	2.52838	354.361	10.8497	667.491	81.2805	5.41384	10.7611	21.559	0.554525
30	380.406	0.277197	52.3763	0.21467	83.948	285.581	17.7777	581.865	124.014	114.415	28.2829	54.8081	6.11143
31	40.9139	0.0478507	58.8167	0.174986	9.10979	97.6648	11.9691	303.716	54.3895	12.6622	6.02722	29.7681	0.649426
32	227.112				29.289		8.47154	701.157		22.2052	9.83519		2.25393
33	505.098	0.495837	53.3264	0.322486	173.004	792.193	13.6464	695.382	257.247	110.964	18.4585	54.9068	3.84711
34	169.016	0.0616917	55.7137	0.153452	49.0545	147.395	6.09799	407.083	87.1871	91.8132	14.2452	37.6916	0.85657
35	371.674	0.18334	50.597	0.185469	172.792	343.461	9.68016	777.384	124.256	55.2057	27.0475	49.097	2.83065
36	101.409	0.0695557	56.148	0.176833	12.7791	94.8324	8.8958	420.728	67.2479	18.0149	13.396	32.0305	0.890497
37		0.0996572	50.1392	0.147114	52.1745	482.507	9.26307	839.453	184.414	48.0255	14.0469	69.1844	1.24634
38	92.8963	0.133045	50.6004	0.15906	50.5631								1.41968
39	117.446	0.0610421	60.7419	0.15882	18.5503	108.05	6.06139	495.731	91.6381	61.9803	11.8264	31.4906	0.871845
40	92.4453	0.0608092	55.9389	0.205771	13.7609	64.9443	5.52785	609.733	112.005	66.1654	15.7102	39.614	0.618397
41	441.041	0.215564	50.2549	0.161025	104.279	424.158	16.1538	849.063	343.03	23.2539	22.6351	52.567	1.79941
42	269.737	0.210049	54.8774	0.168703	79.6381	498.916	18.9563	646.975	314.885	69.9262	19.1816	56.0727	2.10271
43		0.0984525	51.0575	0.226737	49.3302	291.429	7.1514	1119.86	296.778	73.9039	14.7707	50.7124	1.13911
44	197.473	0.0763812	50.801	0.166479	24.8651	210.732	8.28335	634.245	194.597	30.752	11.3217	32.9196	0.629904
45	283.772				11.0029	243.325	6.91935	907.425	221.663	19.5071	17.5953	65.4684	1.52732
46	186.391	0.12564	55.9118	0.224933	2.68498	272.429	3.85464	634.432	91.4311	11.3047	13.414	36.9378	0.614409
47	261.06	0.214317	50.9475	0.176839	49.6882	391.857	11.3505	965.063	219.839	14.2644	15.5584	39.7293	2.95052
48	357.076	0.230839	49.4128	0.178474	115.871	603.725	18.8505	862.064		65.7194	24.038	80.8184	3.11609
49	236.981	0.133827	52.6981	0.183671	43.2471								2.64112
50	164.525	0.0810807	50.7514	0.151214	38.6136	377.167	16.4252	818.81	132.034	18.6256	10.7549	37.4939	1.11697
51	258.939	0.0688085	53.192	0.153131	37.1322	227.331	16.3538	995.92	140.613	107.539	30.1486	62.262	1.4906
52	116.214	0.0934201	57.5751	0.166886	14.9183	97.9411	11.3077	891.936	92.5704	53.5017	16.9869	52.9259	1.16903
53	433.524	0.19265	51.7379	0.138827	193.422	729.824	11.918	1047.76	197.036	165.169	20.8498	76.6124	4.96884
54	102.269	0.073008	59.6943	0.209652	16.8337	255.113	9.27531	734.84	86.627	28.1692	13.6171	44.3989	1.75829
55	113.209	0.0426427	62.4378	0.15066	10.7338	226.042	7.76485	548.882	82.5513	21.5669	11.2447	47.3559	0.788201
56	274.188	0.102497	54.5609	0.182011	53.0012	171.235	9.31563	399.842	65.2125	54.7706	11.2248	26.4486	0.878316
57		0.0673508	56.8596	0.178052	11.4348	128.593	5.74129	331.197	41.9233	16.0458	9.47026	22.1097	0.533362
58	446.783				136.097	756.05	18.9642	855.908	261.172	83.8971	19.3501	66.8926	1.34326
59		0.071815	49.3929	0.1455	11.0748	274.507	5.33763	453.059	84.8359	3.74998	6.78912	48.0164	0.595131
60	22.0314				1.7786	139.083	9.24164	532.558	134.94	28.0281	11.0471	54.0064	0.949687
61	25.3857	0.0359942	54.4919	0.182059	4.46359	128.865	7.68496	472.259	101.544	29.9214	9.76895	58.5047	0.754776
62	360.355	0.34519	49.4542	0.210682	35.5064	394.522	13.8825	825.908	179.316	72.0909	33.4551	77.3595	5.23078
63		0.0741482	53.4053	0.190328	23.1486	165.891	9.45041	470.411	103.861	120.311	13.9602	55.6081	0.953754
64	355.284	0.310879	50.5482	0.258653	140.356								4.41204
65	155.435	0.0393754	53.6972	0.187505	8.35107	176.681	8.43785	574.486	114.252	13.3614	15.7905	17.0604	0.562477
66	26.1488	0.049273	55.5112	0.211341	2.26108	244.058	8.87816	395.592	79.9539	5.75454	9.31606	15.378	0.500548
67	221.554	0.0921216	52.1629	0.208707	86.3435	552.384	10.8313	646.112	193.375	27.0568	9.28833	73.2791	0.917987
68	145.786	0.0724525	52.2628	0.170707	57.9856	514.878	8.73541	916.298	173.259	31.3714	9.92262	56.558	0.817556
69		0.0272837	56.7179	0.167888	8.77682	149.679	7.1153	665.038	151.234	24.3624	6.15158	74.7318	0.438003
70	218.51	0.0668783	49.8921	0.21081	11.9056	334.979	18.0671	512.853	145.515	10.346	9.47997	57.6621	1.83473
71	182.682	0.139083	50.2305	0.222411	6.29392	314.6	17.9438	284.219	48.0517	13.4064	6.47013	13.4028	1.86818
72	22.0594	0.0482344	60.2601	0.37254	3.81782	104.301	6.34117	376.471	108.306	21.2994	12.1702	27.5433	0.459123
73	193.308	0.126838	53.0587	0.250363	99.3679								1.93391
74	53.771	0.057059	54.1711	0.522526	7.02016	156.757	8.40769	575.298	98.2129	45.4264	7.74454	84.5466	2.33985
75	25.5083	0.034128	51.4379	0.175574	4.70241	199.521	6.80529	620.265	97.4004	25.9643	10.958	21.1064	1.06997
76	103.177	0.098772	49.2408	0.312609	49.6714	411.588	6.50104	651.726	137.601	19.2601	8.27394	16.023	1.69928
77	92.9383	0.0729896	49.0808	0.184451	10.265	431.793	10.7653	533.766	129.443	4.63304	8.32563	17.5401	1.52019
